# Supplementary material for: Development of Ionic Liquid Modified Disposable Graphite Electrodes for Label-Free Electrochemical Detection of DNA Hybridization Related to Microcystis spp
Source: MDPI journal article supplement (doi:10.3390/s150922737), 2015-09-09
Supplement: s1 [file s1]

## Supplementary Information

## Development of Ionic Liquid Modified Disposable Graphite Electrodes for Label-Free Electrochemical Detection of DNA Hybridization Related to *Microcystis* spp. *Sensors* 2015, 15, 22737-22749

Ceren Sengiz <sup>†</sup>, Gulsah Congur <sup>†</sup> and Arzum Erdem <sup>\*</sup>

Faculty of Pharmacy, Analytical Chemistry department, Ege University, Bornova, 35100 Izmir, Turkey; E-Mails: [ceren.sengiz@gmail.com](mailto:ceren.sengiz@gmail.com) (C.S.); [gulsah.congur@gmail.com](mailto:gulsah.congur@gmail.com) (G.C.)

<sup>†</sup> These authors contributed equally to this work.

<sup>\*</sup> Author to whom correspondence should be addressed; E-Mail: [arzum.erdem@ege.edu.tr](mailto:arzum.erdem@ege.edu.tr) or [arzume@hotmail.com](mailto:arzume@hotmail.com); Tel.: +90-232-3115131; Fax: +90-232-3885258.

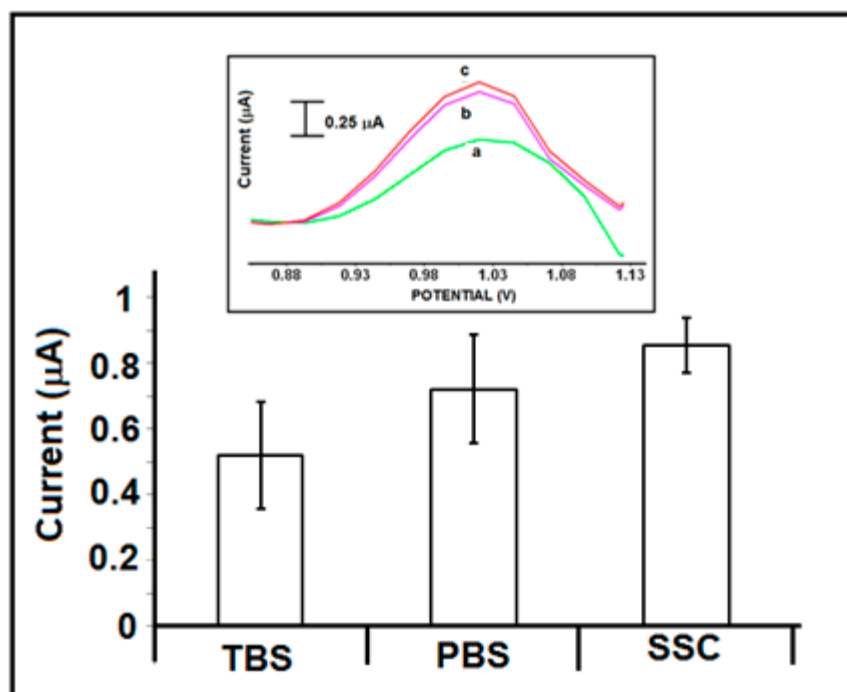

**Figure S1.** Histograms representing the average guanine signals (n=3) obtained after hybridization of 15 μg/mL MYC DNA probe and 20 μg/mL MYC DNA target in TBS (pH 7.0), PBS (pH 7.4) and SSC (pH 7.0). Inset: The voltammograms representing the guanine signals obtained after hybridization of 15 μg/mL MYC DNA probe and 20 μg/mL MYC DNA target in (a) TBS (pH 7.0), (b) PBS (pH 7.4) and (c) SSC (pH 7.0).

**Table S1.** The anodic peak currents ( $I_a$ ), anodic charge values ( $Q_a$ ), peak to peak separations ( $\Delta E_p$ ) and calculated surface areas ( $A$ ) of PGE and IL modified PGEs.

|                            | $I_a$ ( $\mu A$ ) | $Q_a * 10^{-4}$ (Coulomb) | $\Delta E_p$ (mV) | $A$ ( $cm^2$ ) |
|----------------------------|-------------------|---------------------------|-------------------|----------------|
| PGE                        | 62.31             | 18.1                      | 222               | 0.188          |
| %5 IL modified PGE         | 88.30             | 20.8                      | 144               | 0.266          |
| <b>%10 IL modified PGE</b> | <b>116.20</b>     | <b>23.2</b>               | <b>125</b>        | <b>0.351</b>   |
| %15 IL modified PGE        | 113.60            | 21.8                      | 117               | 0.343          |

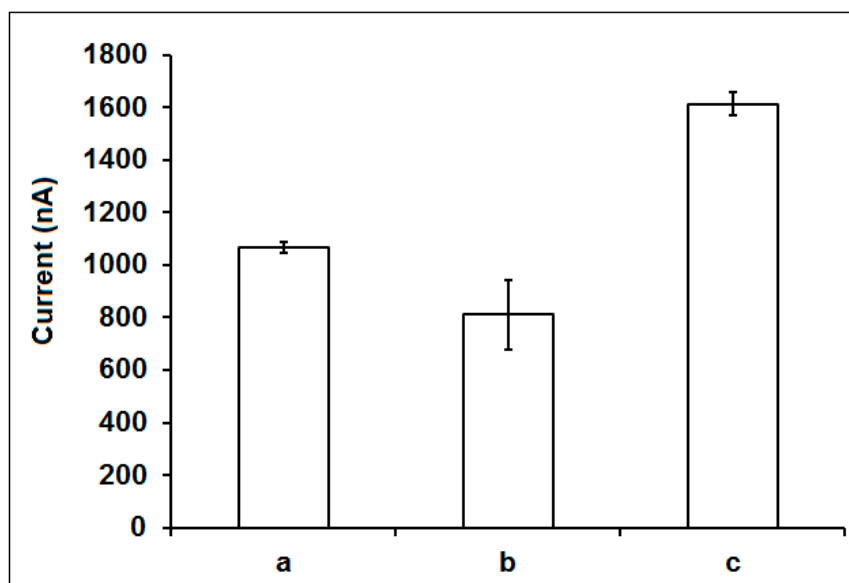

**Figure S2.** Histograms representing the guanine signals ( $n=3$ ) after hybridization between 15  $\mu g/mL$  MYC DNA probe and 20  $\mu g/mL$  (a) MYC DNA target, (b) MM and (c) the mixture of DNA target:MM (1:1) by using IL-PGEs.
